# Supplementary material for: Enhanced 3D sponge with asymmetric wettability: an efficient solution for ultra-low resistance oil aerosol filtration over extended durations
Source: Royal Society of Chemistry journal article supplement (doi:10.1039/d4ta08455a), 2025-01-01
Supplement: d4ta08455a1.pdf [file d4ta08455a1.pdf]

## Supplementary Information

### **Enhanced 3D Sponge with Asymmetric Wettability: An Efficient Solution for Ultra-Low Resistance Oil Aerosol Filtration Over Extended Durations**

*Shuaiheng Zhao<sup>†</sup>, Fangqi Zhou<sup>†</sup>, Ye Tian, Yue Liu, Shasha Feng\*, and Lin Feng\**

Email: fl@mail.tsinghua.edu.cn

Email: fengss@njtech.edu.cn

<sup>†</sup> Shuaiheng Zhao and Fangqi Zhou share the first authorship.

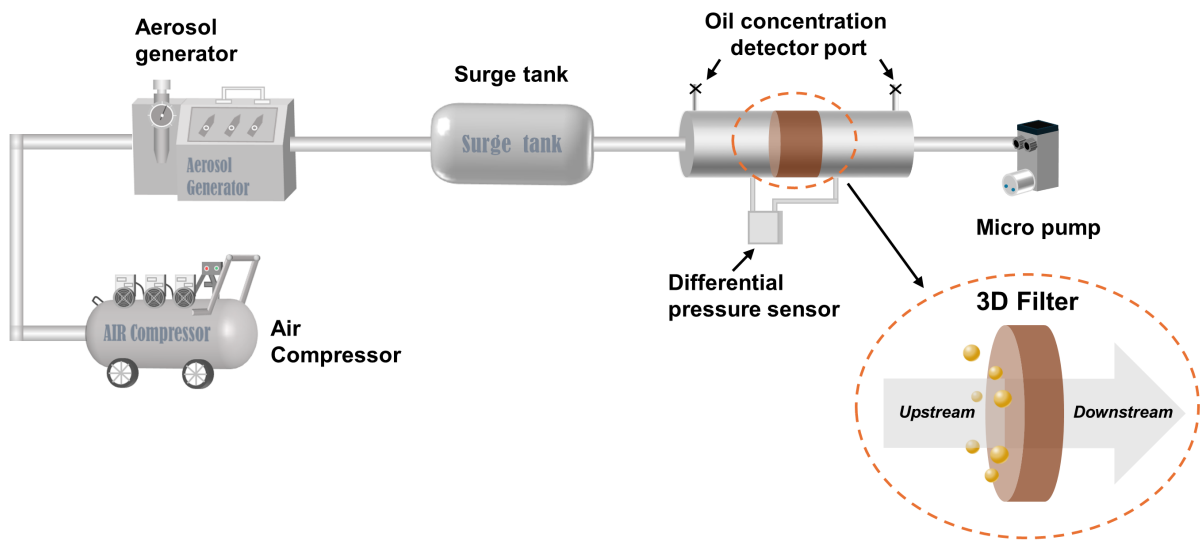

**Fig. S1** A schematic diagram of oil aerosol filtration device.

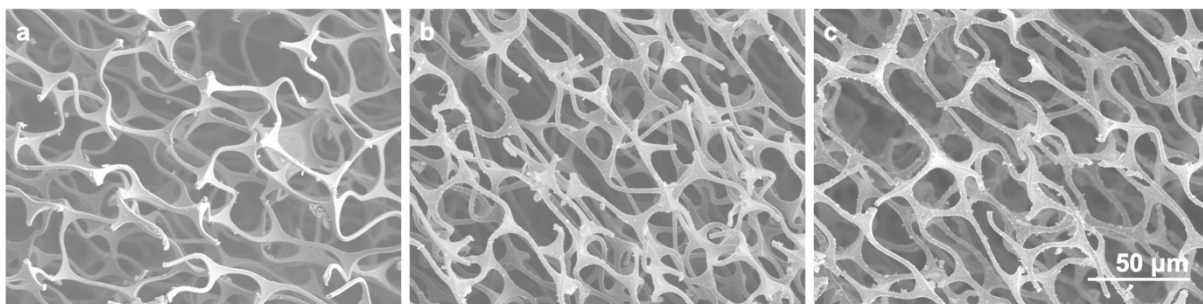

**Fig. S2** Low magnification SEM image of a) the MF sponge substrate; b) SALS; c) SABS.

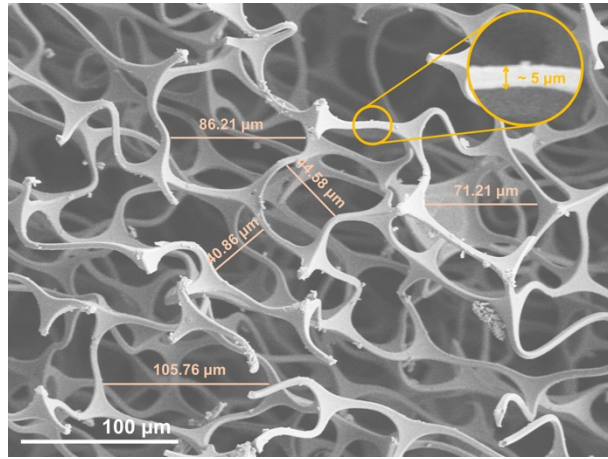

**Fig. S3** The structural characteristics of the pristine MF sponge.

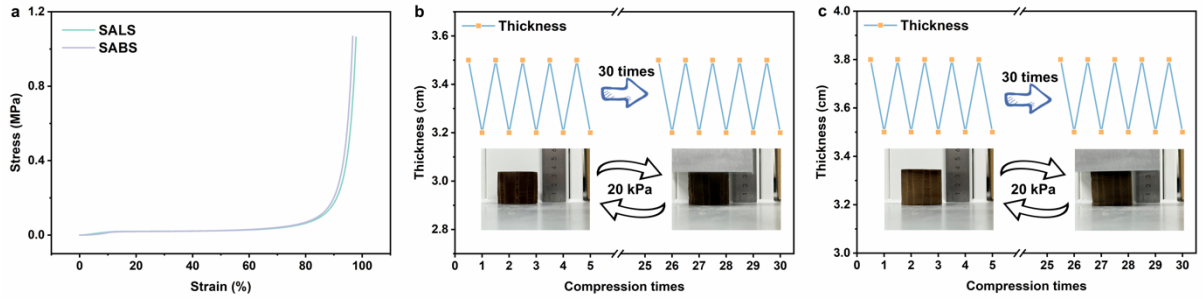

**Fig. S4** The mechanical properties of SALS and SABS: a) The stress-strain curve during compression; b) Cyclic compression-recovery tests of SALS under a 30 kPa load for 30 cycles; c) Cyclic compression-recovery tests of SABS under a 30 kPa load for 30 cycles.

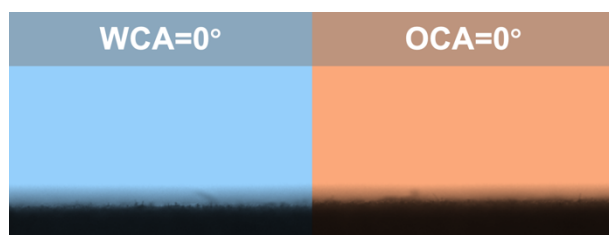

**Fig. S5** Wettability characterization of SALS.

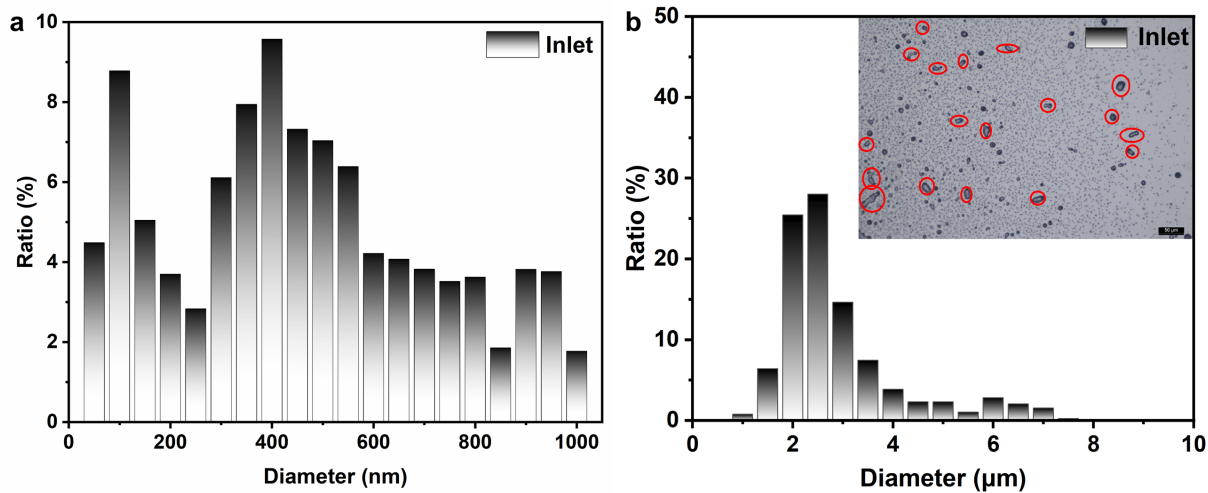

**Fig. S6** The oil droplet size distribution in the oil aerosol: a) Small oil mists (<1 μm); b) Large oil mists (>1 μm).

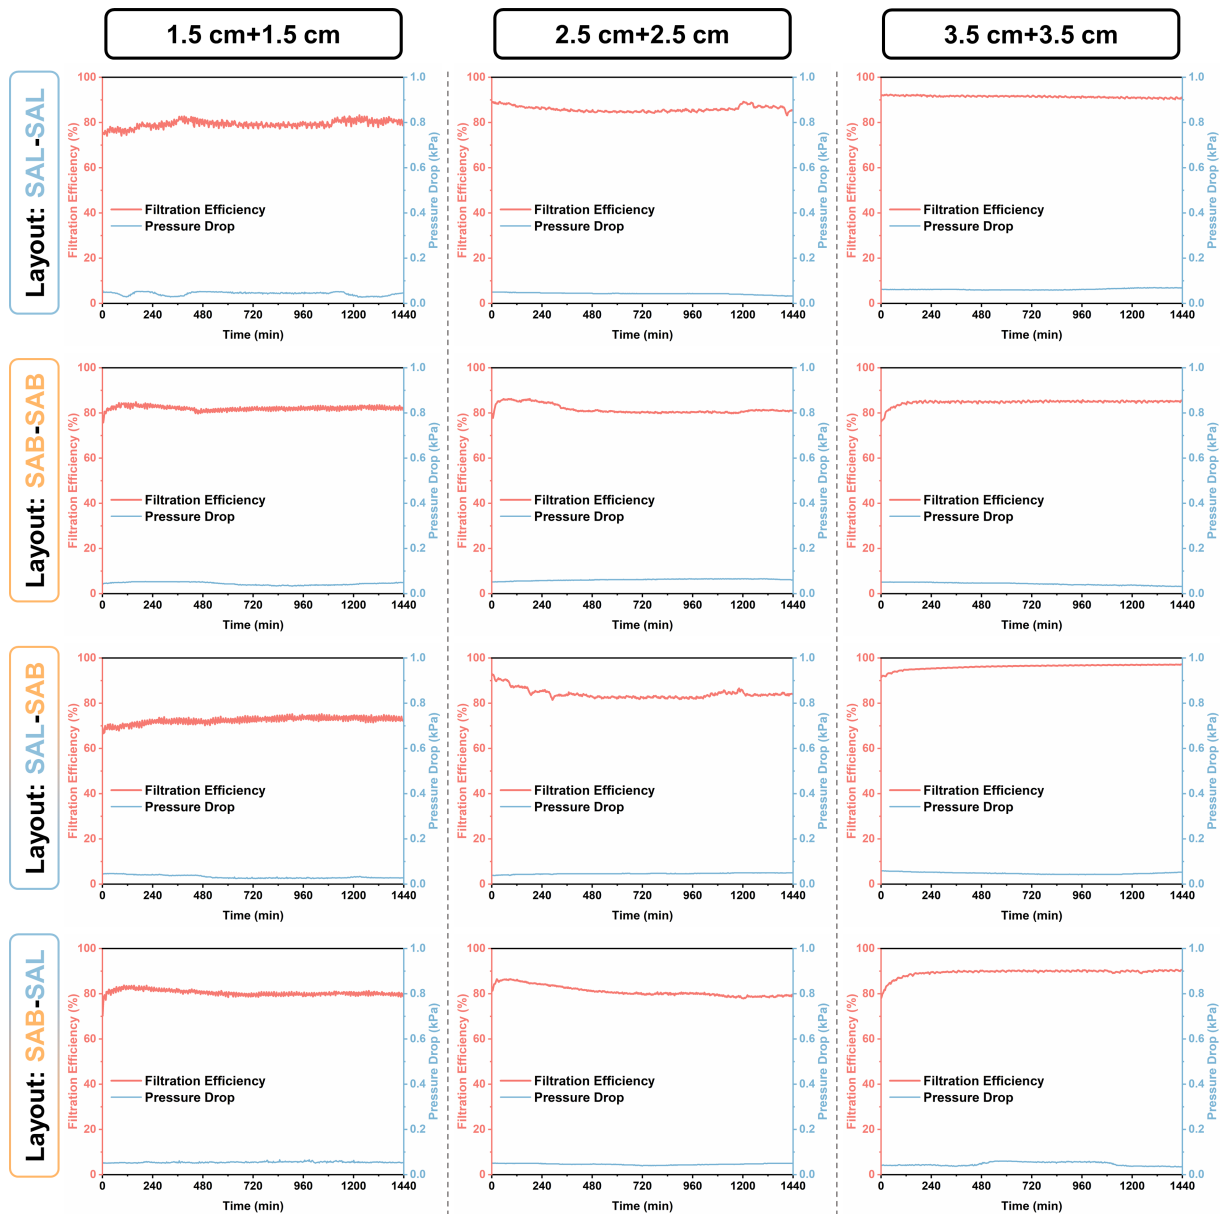

**Fig. S7** The filtration efficiency and pressure drop curves of the 24-hour filtration process for the 12 layouts.



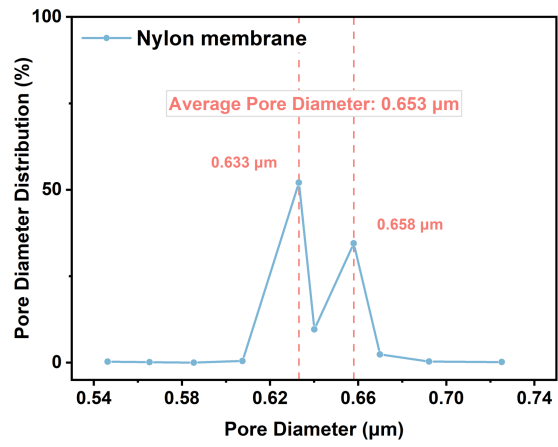

**Fig. S8** The pore size distribution of the nylon membrane substrate.

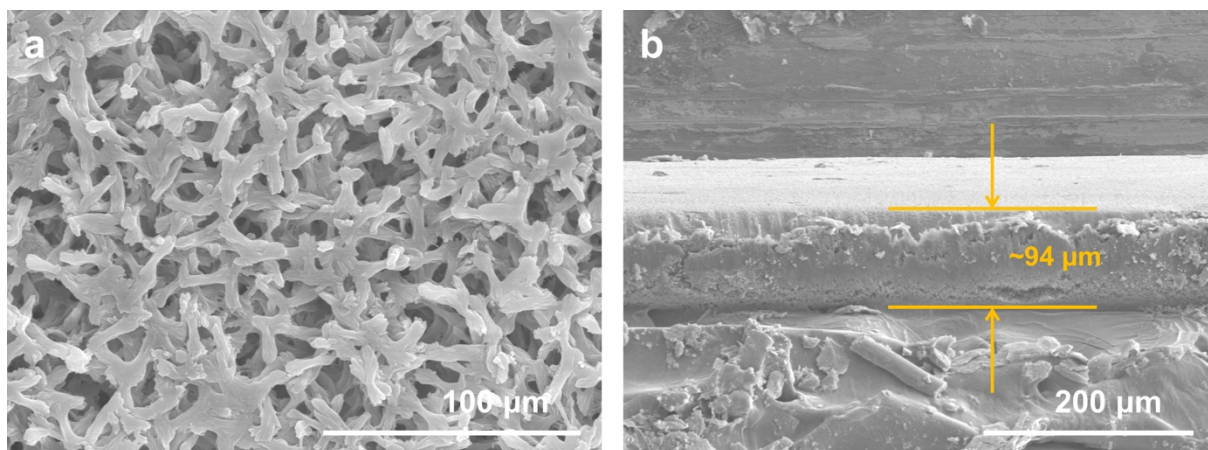

**Fig. S9** The morphology and thickness characterization of the nylon membrane substrate.

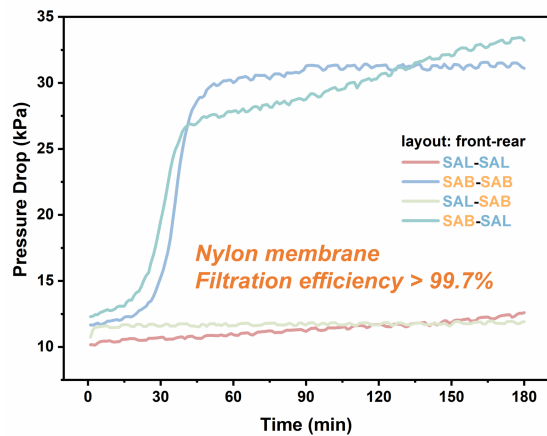

**Fig. S10** The filtration pressure drop curves of the 3-hour filtration process for the 4 layouts for filter prepared by nylon membrane.

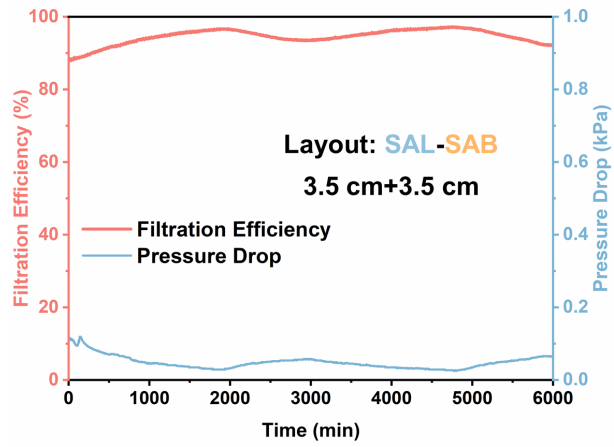

**Fig. S11** The filtration efficiency and pressure drop curves of the 100-hour filtration process for the 3D filter under optimal condition.

**Table S1** Gas permeance of different filter materials

| <b>No.</b> | <b>Material</b> | <b>Gas permeance (m<sup>3</sup> m<sup>-2</sup> h<sup>-1</sup> kPa<sup>-1</sup>)</b> |
|------------|-----------------|-------------------------------------------------------------------------------------|
| 1          | MF sponge       | 3105.1 ± 98.6                                                                       |
| 2          | SALS            | 3112.3 ± 71.1                                                                       |
| 3          | SABS            | 3101.5 ± 106.3                                                                      |
| 4          | Nylon membrane  | 19.1 ± 2.8                                                                          |

**Table S2** Comparison of different materials for oil aerosol filtration.

| No. | Year | Material                                    | Material type (2D/3D) | Filtration duration (h) | Filtration efficiency (%) | Pressure drop (kPa) | Quality factor (kPa <sup>-1</sup> ) | Ref.             |
|-----|------|---------------------------------------------|-----------------------|-------------------------|---------------------------|---------------------|-------------------------------------|------------------|
| 1   | 2012 | Filter media embedded with Teflon fiber     | 2D                    | 3                       | 99.75                     | 3.53                | 1.70                                | [1]              |
| 2   | 2018 | PFAP@GF                                     | 2D                    | -                       | 99.4                      | 8.33                | 0.61                                | [2]              |
| 3   | 2018 | PFTMS@nano-SiO <sub>2</sub> /ePTFE          | 2D                    | 1                       | 97.7                      | 3.1                 | 1.22                                | [3]              |
| 4   | 2018 | Oleophobic coalescing filters               | 2D                    | -                       | 99.8                      | 3.8                 | 1.64                                | [4]              |
| 5   | 2019 | Superoleophobic coalescing filters          | 2D                    | 20                      | 99.9                      | 3.5                 | 1.97                                | [5]              |
| 6   | 2020 | PFAP@GF with asymmetric wettability         | 2D                    | 2.5                     | 99.65                     | 3.41                | 1.67                                | [6]              |
| 7   | 2020 | PFTMS-SiO <sub>2</sub> @PTFE                | 2D                    | 1                       | 99.25                     | 2.4                 | 2.03                                | [7]              |
| 8   | 2021 | PFDTES-grafted SiO <sub>2</sub> @GF         | 2D                    | 1                       | 99.37                     | 8.56                | 0.59                                | [8]              |
| 9   | 2022 | FOTS-grafted TiO <sub>2</sub> @SiC          | 2D                    | 12                      | 98.24                     | 11                  | 0.37                                | [9]              |
| 10  | 2022 | F-SiO <sub>2</sub> @OTS-PTFE                | 2D                    | 0.2                     | 99.96                     | 3                   | 2.61                                | [10]             |
| 11  | 2023 | FOTS-TiO <sub>2</sub> @SiO <sub>2</sub> NFM | 2D                    | 5                       | 99.87                     | 7                   | 0.95                                | [11]             |
| 12  | 2020 | 3D knitted spacer fabrics air filter        | 3D                    | 0.5                     | 90                        | 0.06                | 38                                  | [12]             |
| 13  | 2025 | Thickness-Direction Asymmetric 3D Filter    | 3D                    | 24                      | 96.16                     | 0.048               | 67.71                               | <b>This work</b> |

## Reference

1. S. U. Patel, P. S. Kulkarni, S. U. Patel and G. G. Chase, *Sep. Purif. Technol.*, 2012, **87**, 54-61.
2. X. Wei, F. Chen, H. X. Wang, H. Zhou, Z. L. Ji and T. Lin, *J. Mater. Chem. A*, 2018, **6**, 871-877.
3. C. Xu, J. Fang, Z. X. Low, S. S. Feng, M. Hu, Z. X. Zhong and W. H. Xing, *Ind. Eng. Chem. Res.*, 2018, **57**, 10431-10438.
4. F. Chen, Z. L. Ji and Q. Q. Qi, *Sep. Purif. Technol.*, 2018, **201**, 71-78.
5. F. Chen, Z. L. Ji and Q. Q. Qi, *Sep. Purif. Technol.*, 2019, **209**, 881-891.
6. X. Wei, Y. F. Liu, H. Zhou, F. Chen, H. X. Wang, Z. L. Ji, G. G. Chase and T. Lin, *ACS Appl. Mater. Interfaces*, 2020, **12**, 28852-28860.
7. X. Zhu, S. S. Feng, S. F. Zhao, F. Zhang, C. Xu, M. Hu, Z. X. Zhong and W. H. Xing, *J. Membr. Sci.*, 2020, **594**, 117473.
8. C. W. Xu, Y. Yu and X. D. Si, *Chem. Eng. Res. Des.*, 2021, **172**, 235-241.
9. Y. Wang, J. K. Tang, Z. X. Low, S. S. Feng, Z. X. Zhong and W. H. Xing, *J. Membr. Sci.*, 2022, **642**, 119996.

10. X. Lu, Y. D. Chen, W. T. Yan, K. Z. Wang, Y. Zhou and C. J. Gao, *J. Membr. Sci.*, 2022, **652**, 120476.
11. T. Chen, S. S. Feng, X. Shen, F. Zhang, Z. X. Zhong, H. M. Wu and W. H. Xing, *Sep. Purif. Technol.*, 2023, **322**, 124217.
12. Y. Sheng, L. Zhang, Y. Q. Wang and Z. Z. Miao, *Build. Environ.*, 2020, **177**, 106903.
